# Supplementary material for: A waste newspaper/multi-walled carbon nanotube/TiO2 interlayer for improving the cycling stability of lithium–sulfur batteries by anchoring polysulfides
Source: Royal Society of Chemistry journal article supplement (doi:10.1039/d0dt01808b), 2020-01-01
Supplement: d0dt01808b1.pdf [file d0dt01808b1.pdf]

**A Waste Newspaper/Multi-Walled Carbon Nanotubes/TiO<sub>2</sub> Interlayer  
for Improving Cycling Stability of Lithium-Sulfur Battery by Anchoring  
Polysulfides**

Chenyu Yan,<sup>a</sup> Xue Zhou,<sup>a</sup> Yanhao Wei<sup>a</sup> and Shengtai He<sup>a,b,\*</sup>

<sup>a</sup>School of Material Science and Engineering, Tiangong University, Tianjin 300387,  
China.

<sup>b</sup>Key Laboratory of Advanced Energy Materials Chemistry (Ministry of Education),  
College of Chemistry, Nankai University, Tianjin 300071, China

## Electronic Supplementary Information

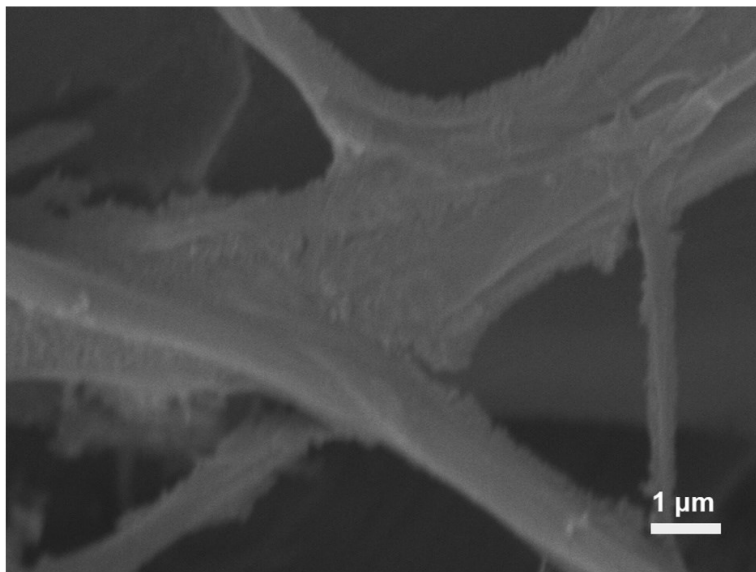

**Figure S1.** SEM image of newspaper after adsorbing ink.

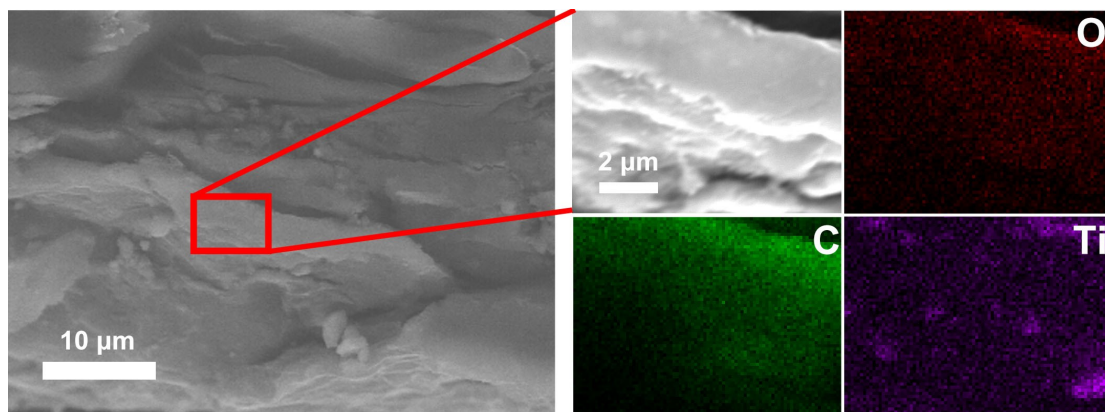

**Figure S2.** The lateral SEM of NMT interlayer and its corresponding elemental mappings of C, Ti, and O.

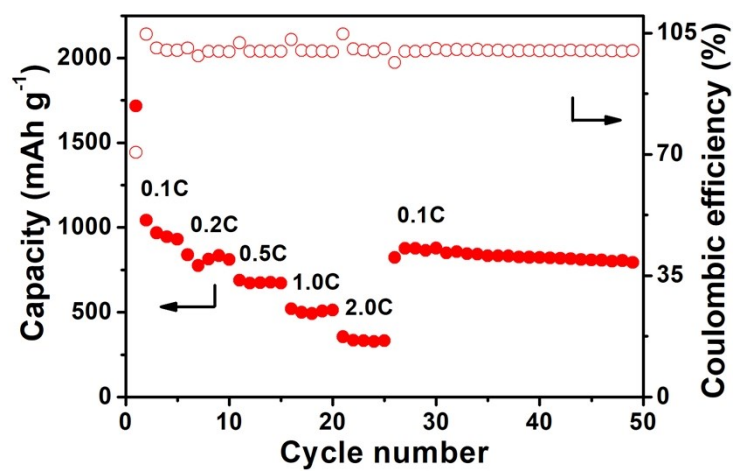

**Figure S3.** The rate performance of a Li-S battery with NMT-B interlayer at 0.1 C to 2.0 C.

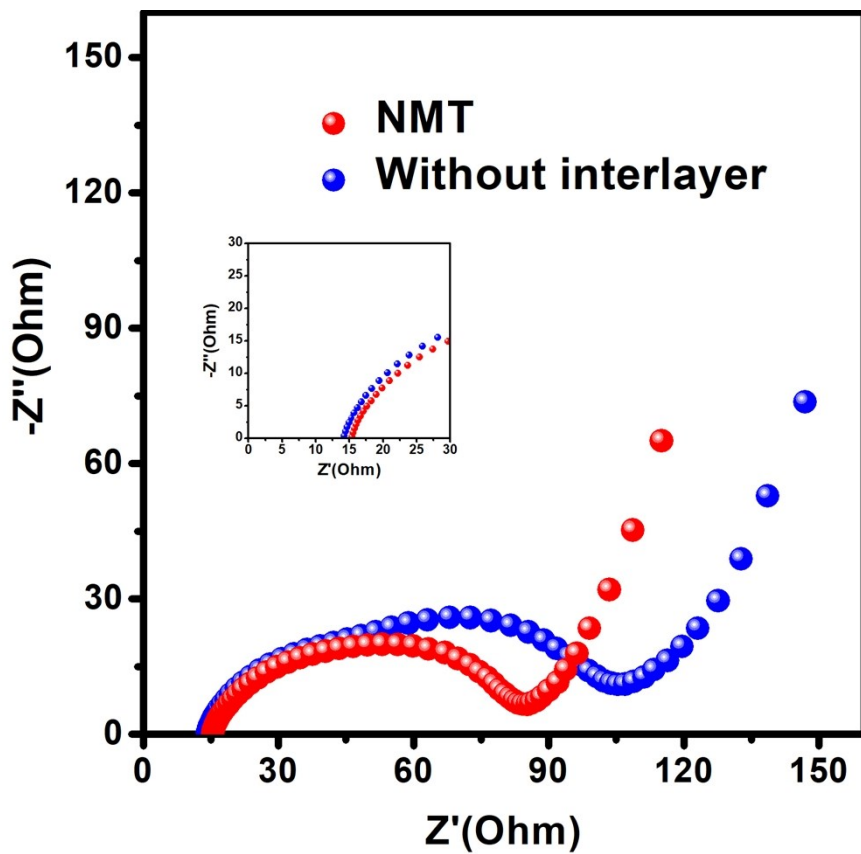

**Figure S4.** The EIS comparison of a Li-S battery with NMT interlayer and a Li-S battery without interlayer

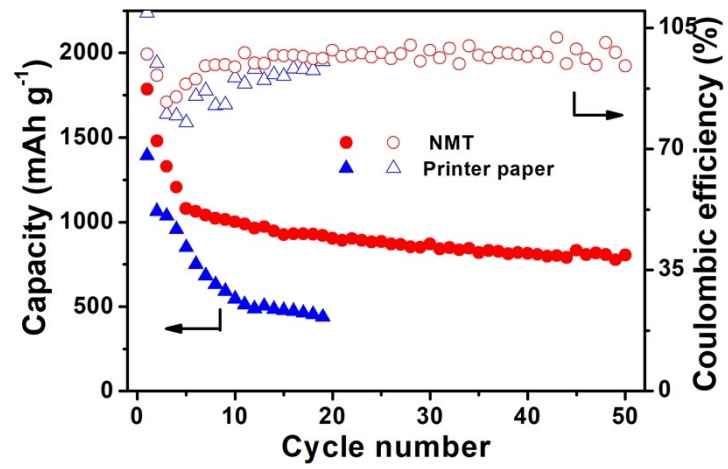

**Figure S5.** The cyclic performance of a Li-S battery with printer paper/MWCNT/TiO<sub>2</sub> and a Li-S battery with NMT interlayer at 0.1 C.

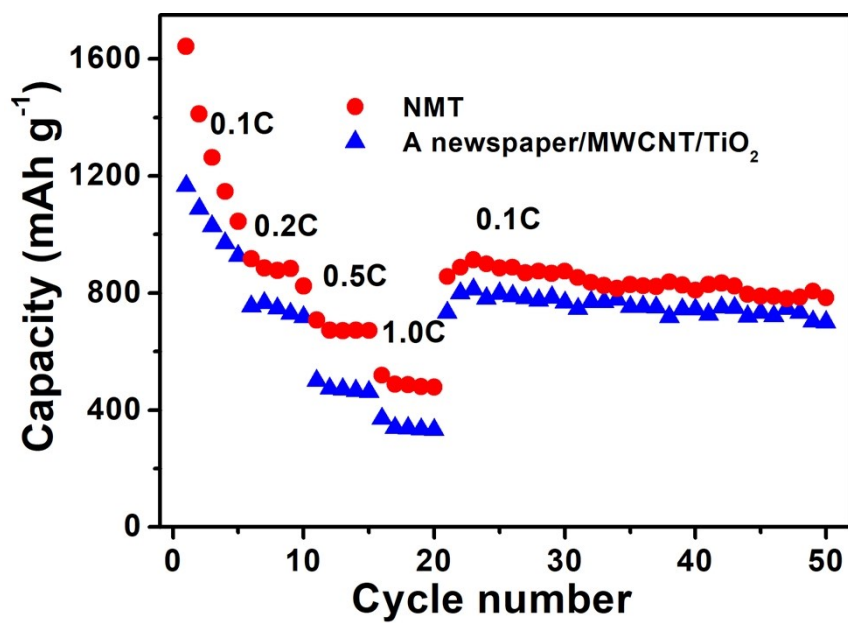

**Figure S6.** The cyclic performance of a Li-S battery with A newspaper/MWCNT/TiO<sub>2</sub> and a Li-S battery with NMT interlayer at 0.1 C.

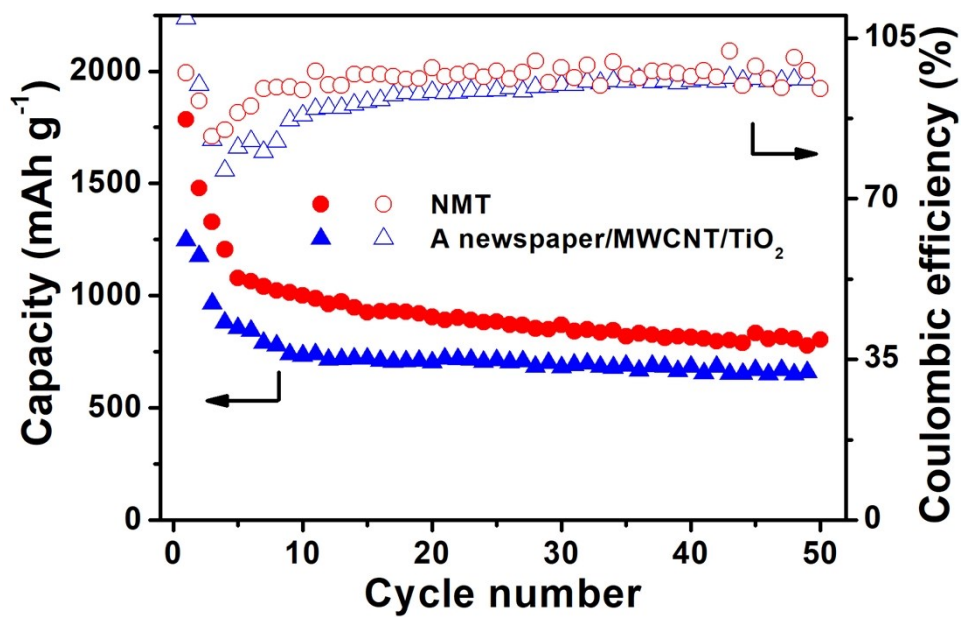

**Figure S7.** The rate performance of a Li-S battery with A newspaper/MWCNT/TiO<sub>2</sub> and a Li-S battery with NMT interlayer at 0.1 C to 2 C.



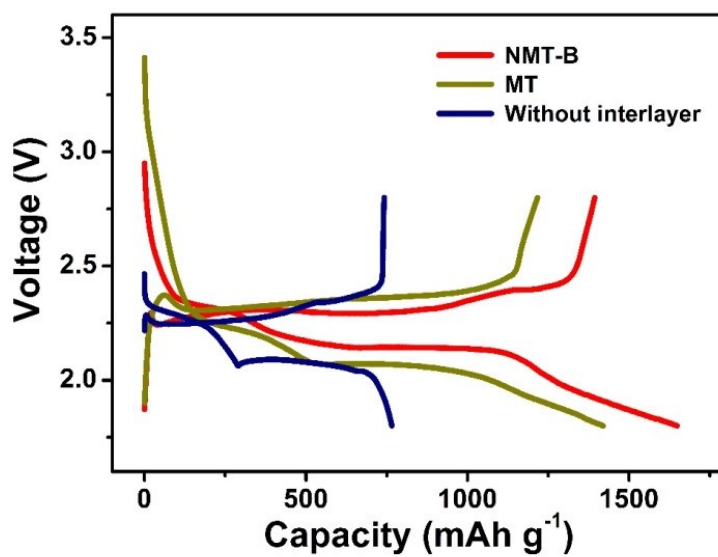

**Figure S8.** The initial charge/discharge profiles of Li-S batteries with NMT-B interlayer, MT interlayer, and without interlayer at 0.1 C.

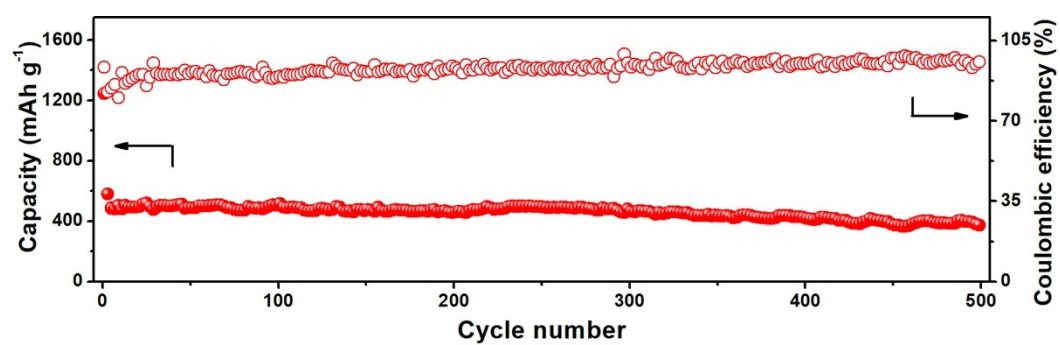

**Figure S9.** The cycle performance of a Li-S battery with NMT-B interlayer and sulfur load of  $2.0 \text{ mg cm}^{-2}$  in  $0.5 \text{ C}$ .

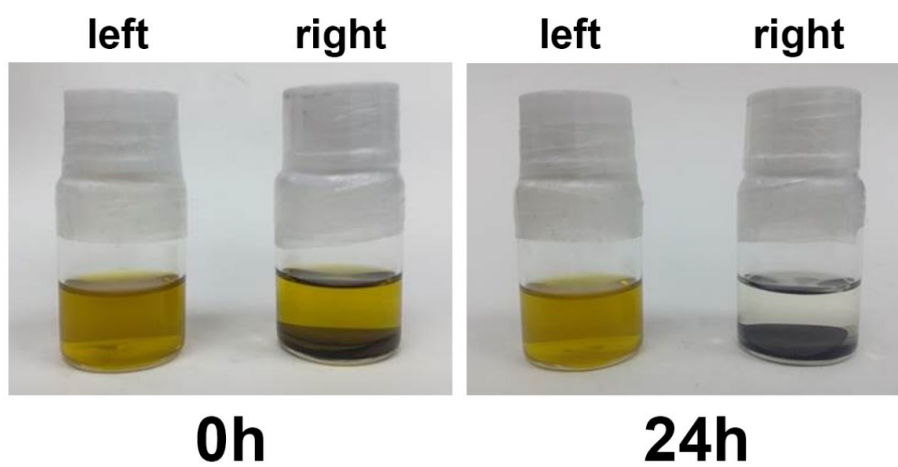

**Figure S10.** Optical photos of  $\text{Li}_2\text{S}_6$  solution without (left) and with (right) NMT interlayer, after 24 h, the  $\text{Li}_2\text{S}_6$  solution with the NMT interlayer becomes colorless.

**Table S1.** Comparison of the performance in Li-S batteries with reported kinds of cellulose-based interlayers.

| Interlayer materials                  | Cycle number | Long-term decay rate | Sulfur loading (mg cm <sup>-2</sup> ) | Preparation Temperature (°C) | Initial capacity (mAh g <sup>-1</sup> ) |
|---------------------------------------|--------------|----------------------|---------------------------------------|------------------------------|-----------------------------------------|
| Carbonized Kimwipes <sup>1</sup>      | 200          | 0.14%                | 1.1                                   | <b>800</b>                   | 1308 (0.1 C)                            |
| CBC/TiO <sub>2</sub> <sup>2</sup>     | 250          | ~0.146%              | 1.5                                   | <b>1000</b>                  | 1314 (0.2 C)                            |
| CCP <sup>3</sup>                      | 130          | 0.105%               | 1.39                                  | <b>800</b>                   | 1200 (0.1 C)                            |
| CF/SPFEK/Super P <sup>4</sup>         | 500          | 0.047%               | 1.5-1.8                               | <b>900</b>                   | 1178 (0.1 C)                            |
| Cellulose/GO <sup>5</sup>             | 200          | 0.250%               | 1                                     | <b>60</b>                    | 1325 (0.1 C)                            |
| Carbonized cotton fabric <sup>6</sup> | 200          | 0.059%               | 5                                     | <b>800</b>                   | 1348.3 (0.1 C)                          |
| Carbonized filter paper <sup>7</sup>  | 50           | 0.920%               | /                                     | <b>800</b>                   | 1500 (0.2 C)                            |
| Bamboo carbon fibers <sup>8</sup>     | 300          | 0.111%               | 2.1                                   | <b>800</b>                   | 907 (0.1 C)                             |
| CNF aerogel <sup>9</sup>              | 200          | 0.120%               | 2.74                                  | <b>800</b>                   | 1283 (0.2 C)                            |
| PBC/GO <sup>10</sup>                  | 200          | 0.055%               | 2.4                                   | <b>800</b>                   | 1170 (0.1 C)                            |
| PBC/SnO <sub>2</sub> <sup>11</sup>    | 120          | 0.4%                 | ~3                                    | <b>500</b>                   | 812 (0.1 C)                             |
| <b>This work</b>                      | <b>500</b>   | <b>0.071%</b>        | <b>1.2</b>                            | <b>60</b>                    | <b>1391.4 (0.1 C)</b>                   |

CBC: carbonized bacterial cellulose, CCP: Carbonized cellulose paper, CF: Carbon felt, CNF: carbon nanofiber, PBC: Pyrolyzed bacterial cellulose, GO: graphene oxide.

## Electronic Supplementary Information References

1. S. Chung and A. Manthiram, *Chem. Commun.*, 2014, **50**, 4184.
2. F. Li, G. Wang, P. Wang, J. Yang, K. Zhang, Y. Liu and Y. Lai, *J. Electroanal. Chem.*, 2017, **788**, 150.
3. S. Li, G. Ren, M. Hoque, Z. Dong, J. Warzywoda and Z. Fan, *Appl. Surf. Sci.*, 2017, **396**, 637.
4. K. Yang, L. Zhong, R. Guan, M. Xiao, D. Han, S. Wang and Y. Meng, *Appl. Surf. Sci.*, 2018, **441**, 914.
5. Q. Zeng, X. Leng, K. Wu, I. Gentle and D. Wang, *Carbon*, **2015**, *93*, 611-619.
6. Q. Zhao, Q. Zhu, Y. An, R. Chen, N. Sun, F. Wu and B. *Appl. Surf. Sci.*, 2018, **440**, 770.
7. K. Zhang, Q. Li, L. Zhang, J. Fang, J. Li, F. Qin, Z. Zhang and Y. Lai, *Mater. Lett.*, 2014, **121**, 1981.
8. X. Gu, C. Li, F. Liu, W. Yang, Y. Hou and S. Zhang, *J. Mater. Chem. A*, 2015, **3**, 9502.
9. S. Li, J. Warzywoda, S. Wang, G. Ren and Z. Fan, *Carbon*, **2017**, *124*, 212.
10. Y. Shen, Z. Xiao, L. Miao, D. Kong, X. Zheng, Y. Chang, L. Zhi, *Rare Metals*, 2017, **36**, 418.
11. K. Celik, E. Cengiz, T. Sar, B. Dursun, O. Ozturk, M. Akbas and R. Demir-Cakan *J. Colloid interface Sci.*, 2018, **530**, 137.
